# Supplementary material for: Characterization of anoikis-based molecular heterogeneity in pancreatic cancer and pancreatic neuroendocrine tumor and its association with tumor immune microenvironment and metabolic remodeling
Source: Front Endocrinol (Lausanne). 2023 May 10;14:1153909. doi: 10.3389/fendo.2023.1153909 (PMC10206226; doi:10.3389/fendo.2023.1153909)
Supplement: Supplementary file 3 [file Table_1.xlsx]

## Sheet: Table S1
Table S1. Genecard platform identification of 501 anoikis genes with score > 0.4
Gene Symbol	Relevance score
BRMS1	14.7102
PTK2	7.28751
NTRK2	7.26254
BCL2L11	6.6916
SRC	6.18427
CEACAM6	6.10318
CAV1	5.4633
AKT1	5.40746
ITGB1	5.00296
CEACAM5	4.65579
EGFR	4.61561
BCL2	4.5414
CASP8	4.48877
SIK1	4.37507
PTRH2	4.1929
STAT3	4.14068
TLE1	4.07099
DAPK2	3.98848
CTNNB1	3.97693
ZNF304	3.94012
MAPK1	3.73449
BMF	3.73254
ITGA5	3.67755
TP53	3.63974
MCL1	3.57908
BCL2L1	3.36204
CASP3	3.11994
CDH1	3.05958
BAD	2.96305
PIK3CA	2.94205
PAK1	2.93086
ITGAV	2.87528
FN1	2.82143
MAPK3	2.72986
PTGS2	2.69213
BAX	2.54813
BCAR1	2.54813
PTEN	2.51846
ERBB2	2.43398
ANGPTL4	2.41724
PDK4	2.41536
CYCS	2.33944
BRAF	2.3353
YAP1	2.33217
ANKRD13C	2.32954
ITGA2	2.29817
ANXA5	2.26591
BIRC5	2.25568
MTOR	2.2497
TIMP1	2.24534
BDNF	2.22146
CSPG4	2.19511
BSG	2.19511
AKT2	2.1826
STK11	2.15035
IGF1	2.14769
IGF1R	2.14696
ITGA6	2.10977
ILK	2.08315
CFLAR	2.08302
RHOA	2.06858
HIF1A	2.06497
DAP3	2.0553
MYBBP1A	2.02088
TLE5	1.99817
ITGA3	1.99809
PTK2B	1.99505
CCND1	1.98137
CTTN	1.98137
CALR	1.94471
ATF4	1.94471
CDCP1	1.93194
PLAUR	1.90784
SKP2	1.90784
CHEK2	1.90721
HGF	1.88337
E2F1	1.87998
EGF	1.87072
PIK3CG	1.86744
ITGB4	1.85564
DAPK1	1.84555
MAPK8	1.83945
PIK3R1	1.82063
PIK3R3	1.81566
MAP2K1	1.79616
CXCL12	1.77687
LGALS3	1.74145
FBXW7-AS1	1.73386
BAK1	1.7301
ABHD4	1.70641
CD44	1.70294
ITGA4	1.68965
FADD	1.68965
PHLDA2	1.68965
TGFB1	1.6855
HMCN1	1.6855
MMP2	1.67228
CEBPB	1.67228
CEMIP	1.67228
CDKN3	1.66656
CBL	1.65423
CASP9	1.65423
SFN	1.65423
MTDH	1.65423
PRKCA	1.63541
TNFRSF10B	1.63541
CXCL8	1.63541
MIR200C	1.63541
AR	1.61842
CDKN2A	1.61572
CPT1A	1.61572
PIK3CB	1.61572
CLDN1	1.61572
MIR204	1.61572
MIR26A1	1.61572
CDKN1A	1.59501
CDKN1B	1.59501
KLF12	1.59501
NTRK1	1.57361
PLAU	1.57311
MYC	1.57311
SMAD4	1.57311
PLK1	1.57311
MUC1	1.57311
LGALS1	1.57311
PYCARD	1.57311
SESN2	1.57311
ITGB3	1.56846
KRAS	1.56846
THBS1	1.5498
BID	1.5498
HRAS	1.53509
CDK11B	1.52476
CDK11A	1.52476
XIAP	1.51813
PPARG	1.49752
IL6	1.49752
MIR145	1.49752
CCR7	1.4674
MSLN	1.4674
RAC1	1.46156
GRHL2	1.46156
BIRC3	1.44828
NOTCH1	1.43815
RHOG	1.43614
CCAR2	1.43614
NQO1	1.43321
MMP13	1.39855
FAS	1.39565
MTA1	1.39565
MYO5A	1.39265
EDA2R	1.39265
CCN6	1.39265
MMP9	1.37434
ABL1	1.37434
MAPK11	1.37434
SOD2	1.37434
PTHLH	1.3706
PDGFB	1.35364
GLI2	1.35364
EZH2	1.35258
RIPK1	1.35137
CXCR4	1.34337
HMGA1	1.33174
SIK2	1.33174
TNFSF10	1.33174
ANGPTL2	1.31324
S100A4	1.30843
NTF3	1.30843
ETV4	1.30843
MIR21	1.30843
MIR124-1	1.30843
HTRA1	1.28338
LATS1	1.28338
CEACAM3	1.28338
EIF2AK3	1.28038
LAMC2	1.28038
LAMA3	1.28038
LAMB3	1.28038
CDH2	1.26068
CSNK2A1	1.26068
EDIL3	1.26068
ZEB2	1.25615
TLN1	1.25615
EPHA2	1.23997
SIRT3	1.23997
OLFM3	1.23997
CLU	1.22602
SPINK1	1.22602
CPEB2	1.22602
NAT1	1.21808
TSG101	1.21808
MIR200A	1.21808
MIR6744	1.21808
SERPINA1	1.21218
AKT3	1.19476
RELA	1.19476
TNFRSF1A	1.19476
FASLG	1.19476
AFP	1.19476
ITGA8	1.19476
NOX4	1.19476
PBK	1.19476
SATB1	1.19476
CD63	1.19476
EEF1A1	1.19476
LTB4R2	1.19476
MAVS	1.19476
HRC	1.19476
CCN2	1.19183
RHOB	1.19183
PPP1R13B	1.19183
PLG	1.18563
MET	1.18429
RAF1	1.16972
PARP1	1.16972
PRKCQ	1.16972
BRCA2	1.16972
RB1	1.16972
SP1	1.16972
HAVCR2	1.16972
DOCK1	1.16972
VTN	1.16972
INHBB	1.16972
PDCD4	1.16972
PRPF4B	1.16972
RANBP9	1.16972
SESN1	1.16972
SESN3	1.16972
CD24	1.16972
ZBTB7A	1.16972
MIR141	1.16972
ELANE	1.15127
KDR	1.14248
MDM2	1.14248
NFE2L2	1.14248
ZEB1	1.14248
KL	1.14248
PRKCI	1.14248
CRYAB	1.14248
EPHB6	1.14248
FGF2	1.14248
HK2	1.14248
LTF	1.14248
IQGAP1	1.14248
MGAT5	1.14248
SDCBP	1.14248
ABHD2	1.14248
SPIB	1.14248
TRIM31	1.14248
MIR1827	1.14248
PDGFRB	1.11236
PLAT	1.11236
TLR3	1.11236
NRAS	1.11236
ROCK1	1.11236
PAK4	1.11236
VEGFA	1.11236
CASP10	1.11236
PIN1	1.11236
IL1RAP	1.11236
UBE2C	1.11236
YWHAZ	1.11236
TWIST1	1.11236
BMP6	1.11236
BNIP3L	1.11236
ELK1	1.11236
KDM3A	1.11236
PRDX4	1.11236
BNIP3	1.11236
LMO3	1.11236
ZNF32	1.11236
MIR200B	1.11236
MIR525	1.11236
MIR363	1.11236
TUBB3	1.09841
HSP90B1	1.09841
SLC2A1	1.07817
HMOX1	1.07817
PTPN11	1.07817
PRKACA	1.07817
PAK3	1.07817
CD36	1.07817
PIK3R2	1.07817
PPP2CA	1.07817
CASP6	1.07817
CDH3	1.07817
EEF2K	1.07817
LRP1	1.07817
PAK2	1.07817
PTK6	1.07817
LPAR1	1.07817
TCF7L2	1.07817
CEACAM1	1.07817
GDF2	1.07817
GLO1	1.07817
IL17A	1.07817
RBL2	1.07817
SIRPA	1.07817
TRAF2	1.07817
ADCY10	1.07817
VPS37A	1.07817
TNFRSF12A	1.07817
APOBEC3G	1.07817
BAG1	1.07817
COL13A1	1.07817
MNX1	1.07817
RAD9A	1.07817
IFI27	1.07817
MEGF11	1.07817
ITPRIP	1.07817
BCL2L15	1.07817
SNAI2	1.05007
PTPN1	1.03761
NOTCH3	1.03761
GLUD1	1.03761
SIRT1	1.03761
FASN	1.03761
MYH9	1.03761
RPS6KB1	1.03761
TPM1	1.03761
PPP2R1A	1.03761
COL4A2	1.03761
CTNND1	1.03761
CD151	1.03761
MMP11	1.03761
ARHGEF7	1.03761
PPP2R2A	1.03761
SEMA7A	1.03761
PPP2R5A	1.03761
BST2	1.03761
CCN1	1.03761
PPP2R2D	1.03761
CCDC178	1.03761
MIR10A	1.03761
MIR30B	1.03761
MIR30C1	1.03761
SHC1	1.0167
BUB1	0.984749
CDC25C	0.984749
CDK1	0.984749
ITGB5	0.984749
SETD2	0.984749
BUB3	0.984749
FER	0.984749
TP73	0.984749
SLCO1B3	0.984749
TDGF1	0.984749
DLG1	0.984749
EDAR	0.984749
MAD2L1	0.984749
BCL2L2	0.984749
PDCD6IP	0.984749
SH3GLB1	0.984749
SCRIB	0.984749
DYNLL2	0.984749
TSC2	0.958522
BAG4	0.920355
MAP3K7	0.917962
F10	0.857139
F3	0.857139
ADAMTSL1	0.857139
SERPINB1	0.857139
MIR181A1	0.857139
MAP3K1	0.83795
CTBP1	0.83795
CEACAM4	0.803757
PXN	0.791615
MALAT1	0.787873
GSTP1	0.763197
PRDX1	0.763197
IKBKG	0.737493
TFDP1	0.737493
CRYBA1	0.737493
SERPINE1	0.730513
FOXO3	0.729289
ACTG1	0.710339
ARHGDIA	0.710339
EZR	0.710339
SLC39A6	0.710339
BIN1	0.700655
TIAM1	0.700655
PDPK1	0.69632
SMAD7	0.673421
NTRK3	0.643296
RHOC	0.643296
CASP2	0.635348
TNC	0.612036
IRF6	0.612036
HOTAIR	0.609103
GNE	0.586991
XAF1	0.586991
SFRP1	0.582729
MAP2K2	0.568543
CSK	0.568543
PIK3C2B	0.568543
TAGLN	0.568543
ENDOG	0.568543
FOXC2	0.568543
RACK1	0.568543
ARHGDIB	0.568543
FBLIM1	0.568543
CCDC80	0.568543
PRKD1	0.559756
LDHA	0.529631
ANXA2	0.529631
SPP1	0.529631
SMARCE1	0.529631
QSOX1	0.529631
RBFOX2	0.529631
RPS6KA3	0.495438
CDC42	0.495438
MAOA	0.495438
PIP5K1C	0.495438
ATF2	0.495438
JUP	0.495438
NDRG1	0.495438
NKX2-1	0.495438
OCLN	0.495438
CRABP2	0.495438
ID2	0.495438
CEACAM8	0.495438
PITPNC1	0.495438
AFAP1L1	0.495438
INSR	0.454879
HSPB1	0.454879
NGF	0.454879
PCNA	0.454879
GSK3B	0.454879
TP63	0.454879
KRT14	0.454879
SPHK1	0.454879
CTNNA1	0.454879
EHMT2	0.454879
OGT	0.454879
RAC3	0.454879
SIRT6	0.454879
ACP1	0.454879
FOXA1	0.454879
STK38	0.454879
RHOQ	0.454879
ONECUT1	0.454879
S100A7	0.454879
SRSF3	0.454879
MUC4	0.454879
GKN1	0.454879
MIR107	0.454879
MIR630	0.454879
DNMT1	0.402021
LCK	0.402021
MERTK	0.402021
UCHL1	0.402021
CDK2	0.402021
MMP3	0.402021
ACTB	0.402021
BRCA1	0.402021
SLC2A2	0.402021
NOS2	0.402021
USP9X	0.402021
ROR1	0.402021
FYN	0.402021
HSPA1A	0.402021
HTRA2	0.402021
SNAI1	0.402021
C5AR1	0.402021
LATS2	0.402021
PRDM1	0.402021
SKI	0.402021
TPP2	0.402021
XRCC5	0.402021
CLDN18	0.402021
SPTA1	0.402021
THY1	0.402021
TJP1	0.402021
CDX2	0.402021
CENPF	0.402021
DOK2	0.402021
S100A11	0.402021
SERPINB5	0.402021
CLIC4	0.402021
IKZF3	0.402021
SNCG	0.402021
USP11	0.402021
ELAVL1	0.402021
HOXA10	0.402021
LGALS8	0.402021
SRPX2	0.402021
SLPI	0.402021
HTRA3	0.402021
EFHD2	0.402021
IRX1	0.402021
CXCL14	0.402021
KIF18A	0.402021
ZG16B	0.402021
SBSN	0.402021
MIR223	0.402021
MIR503	0.402021
MIR99A	0.402021
MIR451A	0.402021
MIR7-1	0.402021
SNORA80E	0.402021

## Sheet: Table S2
Table S2. Identification of 40 differentially expressed genes between PAAD and adjacent normal tissues based on TCGA, GSE28735 and GSE62452 datasets
FN1
SPINK1
PDK4
PLAT
SLPI
ITGA2
MET
BNIP3
PLAU
SLC2A1
CEACAM6
LAMC2
EDIL3
CDCP1
ITGA3
MMP11
CEACAM5
IFI27
CD36
IL1RAP
HK2
PAK3
LAMB3
LAMA3
ITGB4
NQO1
LMO3
CDH3
EGF
CLDN18
NOX4
CEACAM1
CEMIP
MMP9
SERPINB5
TRIM31
MSLN
MUC4
SLCO1B3
MMP13
